# 1 Shape analysis of Iron Age sheep astragali 2 suggests west-to-east morphotype 3 diffusion in the southern Levant

4

5 Sierra A. Harding<sup>1</sup> and Nimrod Marom<sup>1\*</sup>

6

7 <sup>1</sup>Laboratory of Archaeozoology, School of Archaeology and Maritime Cultures, University of Haifa.

## 8 Abstract

9 We examine the possibility that expanding trans-Mediterranean trade during the Iron Age (ca.  
10 1,000–350 BCE) has resulted in increased morphological variability among sheep from maritime  
11 sites in the southern Levant. Using geometric morphometric tools, we compared the variability in  
12 sheep astragal morphology in a port settlement on the Carmel coast (Tel Dor), a coastal  
13 settlement in the Akko valley (Tell Keisan), and an inland urban settlement in the Hula Valley  
14 (Tel Abel Beit Maacah). Our results suggest that the sheep astragali from the port settlement at  
15 Tel Dor occupy a significantly different part of shape space than the specimens examined from  
16 the two other sites. In addition, a source-sink dynamic is implied by the appearance of coastal  
17 morphotypes in the inland site, whereas unique inland morphotypes do not occur at the coastal  
18 site. This findings do not contradict the possibility of maritime importation and consequent  
19 overland spread of non-local sheep variants in the southern Levant during the heyday of  
20 ‘Phoenician’ trade.

## 21 Introduction

22 Livestock mobility is a multifaceted phenomenon relating to expansion, demographic growth,  
23 and genetic/phenotypic variability. Traditionally, most studies on livestock mobility focused on  
24 the spread of newly domesticated animals across space and through time (Daly et al., 2018;  
25 Davis & Simões, 2016; Krause-Kyora et al., 2013; Ottoni et al., 2013). In recent years, however,  
26 attention has also turned to later period movement of livestock using techniques like ancient  
27 DNA and geometric morphometrics, which allow us to perceive some of the “Brownian motion”  
28 that has fashioned much of the genetic and phenotypic patterns in ancient livestock (Colominas  
29 Barberà et al., 2019; Evin et al., 2015; Haruda et al., 2019). By tracing subtle dissimilarities  
30 between animals from different times and locales, such techniques allow to track variability  
31 among and between ancient animal populations. In this paper, we use geometric morphometrics  
32 to address the subject of maritime connectivity and livestock mobility, postulating that access to  
33 maritime networks creates coastal sources of phenotypic diversity that can percolate to sinks in  
34 inland regions (Muñiz et al., 1995; Valenzuela-Lamas et al., 2018). In other words, we assume  
35 that maritime livestock mobility could produce a distinctive morphological signature in seaside  
36 settlements, and perhaps a diffusive cline of such morphotypes to settlements remote from the  
37 coast. To explore this idea, we intend to use a standard protocol applied to sheep astragali  
38 (Pöllath et al., 2019), assuming that these small ungulates would have been traded as breeding  
39 stock for their secondary products, especially wool.

40

41 Our case study is located in the Iron Age 2 and the Persian period (9th-5th centuries BCE)  
42 southern Levant, in what is today northern Israel. This region has been partially under the sway  
43 of the Kingdom of Israel and of the coastal city of Tyre in a time period when cross-  
44 Mediterranean maritime connections stretched out from the Levantine coast to the Pillars of  
45 Melkert (Brody, 2002; Broodbank, 2013; Eshel et al., 2018). We expect that the hub of this  
46 extensive maritime network would have received exotic trade goods from a distance, including  
47 sheep livestock, and therefore provide a suitable setting to explore the link between maritime  
48 connectivity and livestock mobility. We focus our efforts on three assemblages from this region  
49 and period: Iron Age 2 (9th to 6th centuries BCE) Tel Dor, an important port south of Mt.

50 Carmel (Gilboa & Sharon, 2003); Tel Abel Beth Maacah (9th to 6th centuries BCE), an inland  
51 town in the Hula Valley, north of the Sea of Galilee (Yahalom-Mack et al., 2018); and Iron Age  
52 2 to Persian period Tel Keisan (9th to 4th centuries BCE), which is located between the Galilee  
53 coast and foothills (Humbert, 1981; Schipper, n.d.). These sites were chosen because they are in  
54 different degrees of remoteness from the sea, and because they have a fair number of astragali  
55 from Iron Age contexts, some of which could be identified as sheep. Our assumption is that the  
56 morphology of sheep astragali at the port site of Tel Dor will be different from that of the inland  
57 site of Tel Abel Beth Maacah, with coastal Tel Keisan assuming an intermediate position. In  
58 other words, we expect a west-to-east morphocline. If our assumption is wrong, there will be no  
59 such effect, and sheep morphologies will be similar between the different sites, which are less  
60 than 100 km apart.

61

62 Specialists in the archaeology of the Iron Age Levant are used to a high, almost decadal-scale  
63 temporal resolution obtained from radiocarbon dating and very refined ceramic chronologies; to  
64 them, the five centuries spanned by our sample may look inapt. We can answer such concerns in  
65 two ways. The first is by noting the trivial fact that we must pool chronostratigraphic phases in  
66 order to even remotely approach a liminal sample size of complete sheep astragali from each site.  
67 The second, which is less trivial, is that we should not assume that the pace of spread of livestock  
68 morphotypes is related in any way to the pace of change in ceramic assemblages on which  
69 archaeological chronostratigraphy is ultimately based. On the contrary, cultural evolution is rapid  
70 in comparison to biological evolution. We therefore think that the scale of time represented by  
71 our samples, which spans a few centuries after the post Bronze Age collapse explosion of trans-  
72 Mediterranean trade, is essentially correct, to an order of magnitude, for observing the more  
73 “viscous” spread of sheep morphotypes.

74

75 Be the case as it may, we do not pertain to having surmounted the issue of insufficient sample  
76 sizes and unresolved spatiotemporal scales in our study. Our results, which represent the first  
77 study of animal mobility in the southern Levant using geometric morphometric methods, should  
78 be taken with a grain of salt.

## 79 Materials

80 The GMM analysis was conducted on a sample of sheep astragali that were osteologically  
81 mature at time of death, as well as free from surface damage, modifications, burning, pathology,  
82 or other anomalies that would inhibit comparison using digital landmarks. Skeletal elements  
83 were visually identified as *Ovis* sp. using morphological criteria (Boessneck, 1970; Zeder &

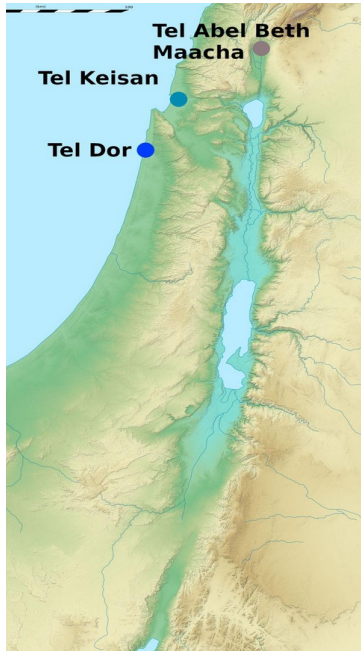

Lapham, 2010) and the comparative collection at the Laboratory  
for Archaeozoology at the University of Haifa.

The sample comprises Iron Age 2 Abel Beth Maacah (ABM,  
N=87); Iron Age 2 Tel Dor (Dor, N=14); and pooled Iron Age 2  
Keisan (Keisan, N=8) and Persian Keisan (Keisan, N=11) ; Figure  
1). Although every effort was made to achieve a spatiotemporally  
balanced dataset for this analysis, the diverse zooarchaeological

**Figure 1:** Site location map. Base map  
by Eric Gaba, Wikimedia Commons.

assemblages included in  
this study are not  
homogenous with respect to  
the sample size from each

site and time period. In the case of Dor, we analyzed a sample of  
N<15. Smaller sample sizes have been shown to be less

statistically powerful in previous analyses and the results produced here should be interpreted  
with caution (Cardini et al., 2015; Pöllath et al., 2019). It is also worth noting that the astragali  
from ABM were recovered from a jar that held more than 400 astragali of diverse artiodactyls  
(Susnow et al., 2021), while the specimens from other sites were derived from refuse layers in a  
settlement context.

102

## 103 Methods

104 **Digitization.** Digital photographs of the anterior surface of each astragalus were taken in ambient  
105 lighting with a Nikon D7500 using an AF-S Nikkor 40mm lens by lab technician Roe Shafir.  
106 The camera was stabilized on the photography table using a 90° stable arm. For each photo, the

107 astragalus was placed in a sand-filled box and a bubble level was used to ensure that the surface  
108 was horizontal. A 1 cm scale was placed at the level of the photographed surface. The dataset of  
109 digital photos was imported into tpsUtil (v.147) (J. Rohlf, 2015). Digitization of landmarks was  
110 conducted by laboratory assistant Daria Loshkin Gorzilov, under the direct supervision of S.  
111 Harding, using tpsDig232 (v.231) (J. F. Rohlf, 2017). We preferred left-side elements; images of  
112 right-side elements were flipped in tpsDig 232. The landmark configuration followed the  
113 protocol outlined in Pöllath et al. (2019): 11 fixed landmarks (LM) and 14 semi-sliding  
114 landmarks (SSLM) were placed around the outline of the dorsal view (Fig. 2). A scale was set  
115 for each photo within tpsDig.

116 **Digitization error.** Digitization errors were checked before statistical analysis by using  
117 tpsSmall64 (v.1.0) and tpsrelw32 (v.1.53) (Rohlf, 2015) according to the protocol described by  
118 (Adriaens, 2007). A subset (N=28) of specimens from the dataset were digitized three unique  
119 times in order to test for digitization error; these were randomly selected but as evenly  
120 distributed between the study sites as possible.

121 **Generalized Procrustes analysis.** A Generalized Procrustes Analysis (GPA) was performed  
122 using the gpagen() function in 'geomorph' (Adams et al., 2022; Adams & Otárola-Castillo,  
123 2013) on the landmark coordinates obtained in tpsDig which produced Procrustes shape  
124 variables (Bookstein, 1991). SSLM's were allowed to slide relative to each other during the GPA  
125 in order to minimize the sum Procrustes distances between each specimen and the mean shape  
126 (Bookstein, 1996). Centroid sizes of the specimens were also produced by the same function.

127 **Principal components and disparity analyses.** We used principal component analysis (PCA,  
128 implemented using the gm.prcmp() function in 'geomorph') to reduce the dimensionality of the  
129 Procrustes transformed landmarks, while retaining most of the variability present among the  
130 Procrustes shapes. In addition to an interpretation of first and second principal component biplot,  
131 we also applied a descriptive disparity analysis aimed to characterize the differences between the  
132 groups based on their size and their positions (Guillerme, Cooper, et al., 2020; Guillerme,  
133 Puttick, et al., 2020): Disparity analysis appeals to us for its simplicity and its generalized,  
134 geometric approach to morphological trait space. The first ten principal component scores of the  
135 specimens were treated as points in a multi-dimensional trait space, where disparity in the size,  
136 density, and positions of the different groups could be calculated. The *size* of a group

137 approximates the amount of trait space it occupies; larger volumes indicate the presence of more  
138 extreme trait combinations (i.e., higher variability) in the shapes present in a group. Size  
139 disparity was measured (Guillerme, 2018) as the median Euclidean distance from the  
140 morphospace centroid along each axis. The *density* of a group relates to the distribution of the  
141 observations within the group's discrete trait space; a higher median density means that more  
142 specimens in a group will tend to be more similar to each other. Density disparity was measured  
143 as the median Euclidean pairwise distance between specimens in a group. The *position* of a  
144 group captures where it resides in the trait space relative to the space's origin; different positions  
145 represent distinct trait combinations for different groups. Position disparity was measured using  
146 average displacements, calculated as the ratio between the median Euclidean distance of the  
147 group members to the centroid of each group and to the origin of the space. Median values  
148 produced in these calculations were bootstrapped with random replacement (N=100).

149 **R libraries.** GMM analysis and visualization were conducted in R (v.4.1.0) (R Core Team, 2022)  
150 using the following packages: 'dispRity' (Guillerme, 2018), 'geomorph' (Adams et al., 2022;  
151 Adams & Otárola-Castillo, 2013), 'tidyverse' (Wickham et al., 2019), and 'ggsci' (Xiao, 2018).

152 **Data availability.** Specimen catalogue, landmark configurations, and R code appear in  
153 Supplement 1.

154

## 155 Results

156 **Digitization error.** Landmark digitization error (DE) was quantified by calculating the ratio of  
157 the mean Procrustes distance of the DE subset (mean=0.034) and the whole dataset (mean=  
158 0.118); the percent of digitization error was 29.37%. This percentage represents the variation in  
159 the sample due to imprecision of landmark placement, which does not have a fixed value  
160 (Yezerinac et al., 1992, p. 471). This percent of DE is within the range expected for highly  
161 morphologically conserved skeletal elements based on other GMM studies (Harding, 2021, p.  
162 59; Hulme-Beaman, 2014, pp. 164–167).

163 **Centroid size.** Median centroid sizes extracted by the `gpagen()` function of the 'geomorph'

164 package prior to Procrustes transformation are plotted in Figure 2. There is a significant  
165 difference in the median size between astragali from the three archaeological contexts, with Tel  
166 Keisan producing the largest median (Kruskal-Wallis chi-squared = 9.7027, df = 2, p-value =  
167 0.01). This is in line with the results based on a log-size index analysis of different skeletal  
168 elements in coastal and inland Iron Age settlements, which suggest a size increase in Persian  
169 period Keisan (Harding et al. in prep.) The greater size of the Keisan specimens suggests to  
170 Harding et al. either higher representation of adult male animals in the population, and therefore  
171 later age-at-death for this sex group, or the improvement of local livestock.

172 **Disparity.** Bootstrapped values for median size, density, and position disparity calculations are  
173 presented in Figure 2. The spread of the bootstrapped values is narrow in ABM, and broader in  
174 Dor and Keisan, reflecting the large differences in sample sizes between the first and latter  
175 assemblages; however, significant differences in disparity parameters between the groups are  
176 evident. Disparity *size*, which reflects the spread of the data around group centroids and therefore  
177 intra-group morphological variability, is similar for inland ABM and coastal Dor, with Keisan  
178 representing slightly less variegated morphologies (Kruskal-Wallis chi-squared =  
179 62.627, df = 2, p-value = 2.516e-14). Disparity *density* is highest at Dor and lowest in Keisan,  
180 suggesting less uniform occupation of shape space in Tel Dor; this means that the specimens are  
181 more dispersed in trait space in that site, and more closely grouped in Keisan, with ABM  
182 assuming intermediate values (Kruskal-Wallis chi-squared = 149.62, df = 2, p-value < 2.2e-16).  
183 Lastly, disparity *position*, the distance of group centroids from the origin of the trait space, is  
184 much higher in Tel Dor than in the other sites (Kruskal-Wallis chi-squared = 225.51, df = 2, p-  
185 value < 2.2e-16). This means that the astragali from Tel Dor occupy a different area of shape  
186 space than those from Tel Keisan and ABM; they are morphologically distinct from them in the  
187 ten-dimensional trait space.

188

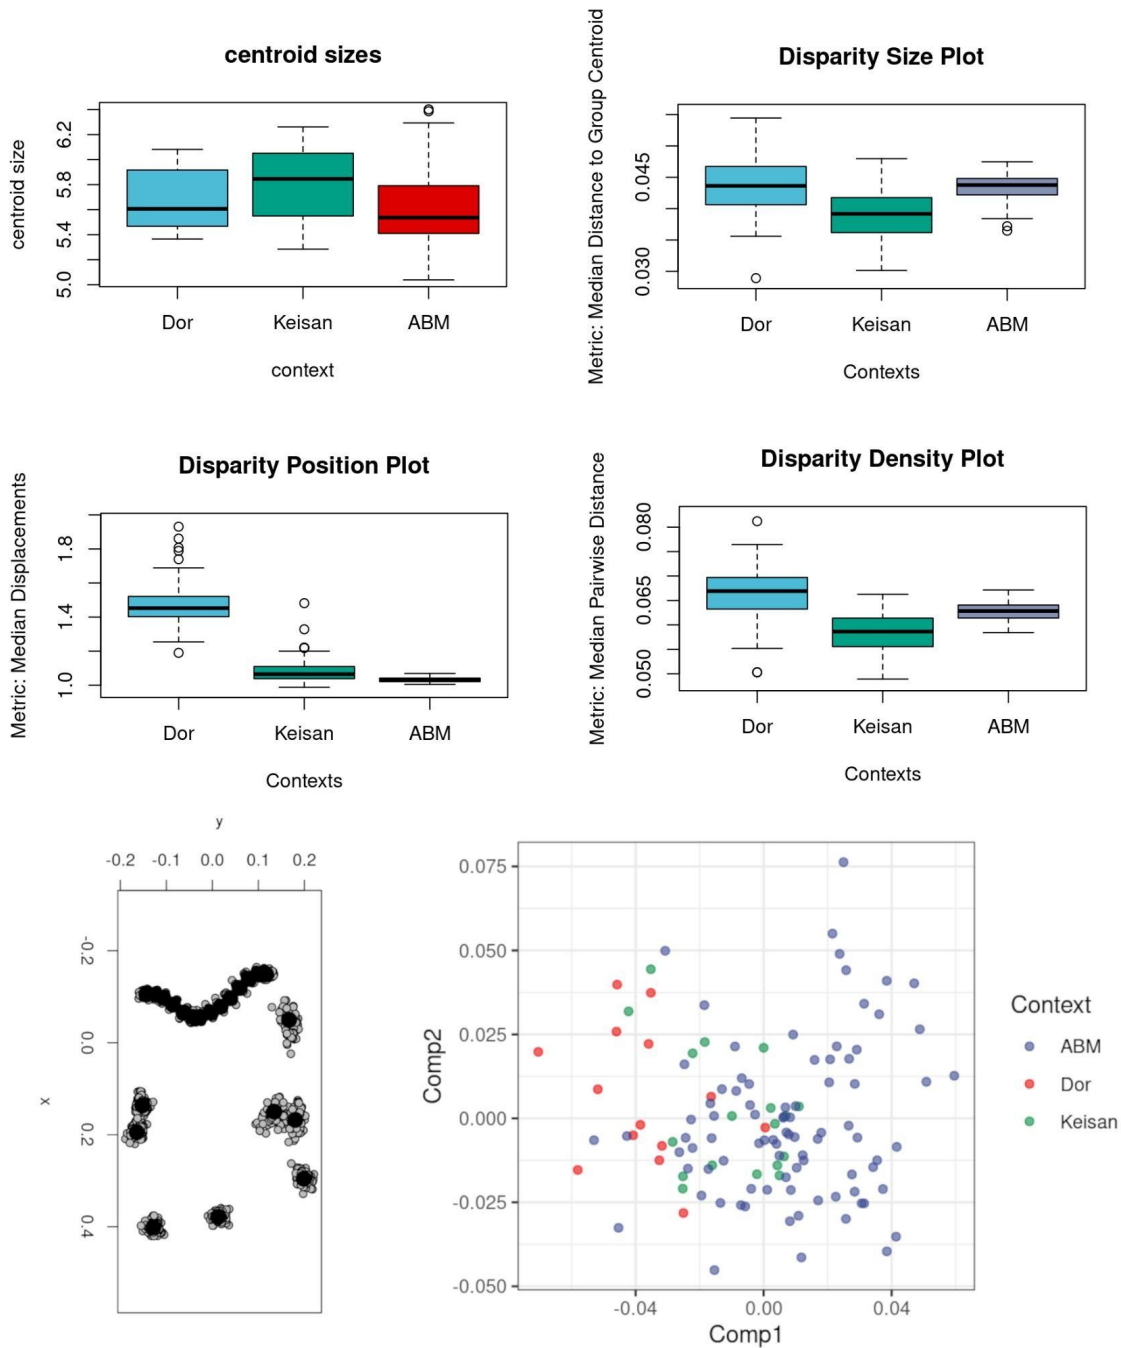

189 **Figure 2:** Boxplots present specimen centroid sizes (top left) and bootstrapped (n = 100) median disparity  
190 statistics (size, position, and density); A plot of the Procrustes transformed landmarks; a shape PCA biplot  
191 (bottom) of astragals from Iron Age 2 Tel Abel Beth Maacha (ABM; n=87), Iron Age 2 Tel Dor (n=14)  
192 and Iron Age 2 + Persian period Tel Keisan (n=19).

193



194 **Principle components 1 & 2.** We plotted the first two principal components obtained from the  
195 shape principle component analysis applied using the `gm.prcmp()` function in the library  
196 ‘geomorph’ to the Procrustes transformed landmark coordinates. The result, presented at the  
197 bottom of Figure 2, shows a remarkable pattern: The specimens from Tel Dor and Tel Keisan  
198 occupy the left side of the plot, with the great majority of PC1 scores smaller than zero and none  
199 larger than 0.01; Tel Keisan specimens are less spread out than those of Dor. The ABM group,  
200 however, behaves differently. Its center of gravity is in the positive range of PC1, but negative  
201 values are also very well represented. We understand this pattern to reflect one-way mobility of  
202 sheep between the coastal and inland sites: the latter, represented by ABM, receive “coastal  
203 morphotypes” (negative PC1 values) while maintaining their own local morphotypes (positive  
204 PC1 values). The inland morphotypes, however, are not represented in the coastal assemblages,  
205 suggesting a source-sink dynamics of livestock introduction from coastal to inland regions.  
206

## 207 Conclusions

208 Our results suggest distinctive patterns of astragular morphology in the Iron Age 2 and Persian  
209 period of contemporary northern Israel. In summary, the seaport of Dor has a large  
210 morphological trait space in relation to its sample size, and it is located in a different position  
211 than ABM and Keisan. Here, disparity analysis allows us to summarize multiple dimensions that  
212 would not be visible in a typical multivariate ordination analysis, and suggests the morphological  
213 distinctness of Dor from both other sites, and its internal heterogeneity. Both, we believe, support  
214 an interpretation of constant introduction of livestock: The different position by pointing at the  
215 divergent overall morphology, and the density by revealing the large range of morphological  
216 variation even within Dor itself.

217 The principal components analysis biplot fleshes out this picture by revealing source-sink  
218 dynamics between the coastal and inland sites. Contrary to our original expectations, the inland  
219 site is more diverse along the first principal component because it receives morphotypes from the  
220 coastal region while retaining native and morphologically distinct forms. These dynamics also  
221 explain why, for all the introduced diversity, the *size* disparity metric is similar for Dor and

222 ABM: while the first may have received animals from distant places, the latter held on to an  
223 important source of diversity in the form of local morphotypes that did not exist along the coast.

224 Our interpretation of the results is far from certain, based on fairly small sample sizes and  
225 a single geographical transect. It does, however, point at a new direction for further research, and  
226 provides solid grounds for further hypothesis testing.

## 227 Acknowledgements

228 We wish to thank Gunnar Lehmann, Ayelet Gilboa, Ilan Sharon and Naama Yahalom Mack for  
229 allowing us to work on the materials from Tel Keisan, Tel Dor, and Abel Bet Maacah. We also  
230 thank Roe Shafir and Daria Lokshin Gorzilov for their technical assistance with specimen  
231 photography and digitization.

## 232 Funding

233 This research was funded by the Israel Science Foundation (252/19).

## 234 References

- 235 Adams, D. C., Collyer, M. L., Kaliontzopoulou, A., & Baken, E. K. (2022). *Geomorph: Software for*  
236 *geometric morphometric analyses* (version 4.0.4.) [Linux].  
237 <https://cran.r-project.org/package=geomorph>.
- 238 Adams, D. C., & Otárola-Castillo, E. (2013). Geomorph: An R package for the collection and analysis of  
239 geometric morphometric shape data. *Methods in Ecology and Evolution / British Ecological Society*,  
240 4, 393–399.
- 241 Adriaens, D. (2007). *Protocol for error testing in landmark based geometric morphometrics*.  
242 [https://www.scribd.com/document/295867417/Geometric-Morphometrics-protocols-for-Error-](https://www.scribd.com/document/295867417/Geometric-Morphometrics-protocols-for-Error-Testing)  
243 [Testing](https://www.scribd.com/document/295867417/Geometric-Morphometrics-protocols-for-Error-Testing)
- 244 Boessneck, J. (1970). Osteological differences between sheep (*Ovis ariea* Linné) and goats (*Capra hircus*  
245 Linné). In D. Brothwell & E. Higgs (Eds.), *Science in Archaeology* (pp. 331–358). Praeger.
- 246 Bookstein, F. L. (1991). *Morphometric Tools for Landmark Data*. Cambridge University Press.
- 247 Bookstein, F. L. (1996). Landmark methods for forms without landmarks: localizing group differences in

- 248 outline shape. *Proceedings of the Workshop on Mathematical Methods in Biomedical Image*  
249 *Analysis*, 279–289.
- 250 Brody, A. (2002). From the Hills of Adonis through the Pillars of Hercules: Recent Advances in the  
251 Archaeology of Canaan and Phoenicia. *Near Eastern Archaeology*, 65(1), 69–80.
- 252 Broodbank, C. (2013). *The Making of the Middle Sea: A History of the Mediterranean from the Beginning*  
253 *to the Emergence of the Classical World*. Thames & Hudson.
- 254 Cardini, A., Seetah, K., & Barker, G. (2015). How many specimens do I need? Sampling error in  
255 geometric morphometrics: testing the sensitivity of means and variances in simple randomized  
256 selection experiments. *Zoomorphology*, 134(2), 149–163.
- 257 Colominas Barberà, L., Evin, A., Campmajó, P., Casas, J., Castanyer i Masoliver, P., Carreras Monfort,  
258 C., Guardia, J., Olesti i Vila, O., Pons i Brun, E., Tremoleda i Trilla, J., & Others. (2019). Behind the  
259 steps of ancient sheep mobility in Iberia: new insights from a geometric morphometric approach.  
260 *Archaeological and Anthropological Sciences*, September 2019, Volume 11, Issue 9, Pp 4971–4982.
- 261 Daly, K. G., Maisano Delser, P., Mullin, V. E., Scheu, A., Mattiangeli, V., Teasdale, M. D., Hare, A. J.,  
262 Burger, J., Verdugo, M. P., Collins, M. J., Kehati, R., Ereğ, C. M., Bar-Oz, G., Pompanon, F.,  
263 Cumer, T., Çakırlar, C., Mohaseb, A. F., Decruyenaere, D., Davoudi, H., ... Bradley, D. G. (2018).  
264 Ancient goat genomes reveal mosaic domestication in the Fertile Crescent. *Science*, 361(6397), 85–  
265 88.
- 266 Davis, S., & Simões, T. (2016). The velocity of Ovis in prehistoric times: the sheep bones from Early  
267 Neolithic Lameiras, Sintra, Portugal. *O Neolítico Em Portugal Antes Do Horizonte 2020:*  
268 *Perspectivas Em Debate*, 2, 51–66.
- 269 Eshel, T., Yahalom-Mack, N., Shalev, S., Tirosh, O., Erel, Y., & Gilboa, A. (2018). Four Iron Age Silver  
270 Hoards from Southern Phoenicia: From Bundles to Hacksilber. *Bulletin of the American Schools of*  
271 *Oriental Research*. *American Schools of Oriental Research*, 379, 197–228.
- 272 Evin, A., Flink, L. G., Bălăşescu, A., Popovici, D., Andreescu, R., Bailey, D., Mirea, P., Lazăr, C.,  
273 Boroneanț, A., Bonsall, C., Vidarsdottir, U. S., Brehard, S., Tresset, A., Cucchi, T., Larson, G., &  
274 Dobney, K. (2015). Unravelling the complexity of domestication: a case study using morphometrics  
275 and ancient DNA analyses of archaeological pigs from Romania. *Philosophical Transactions of the*  
276 *Royal Society of London. Series B, Biological Sciences*, 370(1660), 20130616.
- 277 Gilboa, A., & Sharon, I. (2003). An Archaeological Contribution to the Early Iron Age Chronological  
278 Debate: Alternative Chronologies for Phoenicia and Their Effects on the Levant, Cyprus, and  
279 Greece. *Bulletin of the American Schools of Oriental Research*. *American Schools of Oriental*  
280 *Research*, 332, 7–80.
- 281 Guillerme, T. (2018). dispRity: A modular R package for measuring disparity. *Methods in Ecology and*

- 282 *Evolution / British Ecological Society*, 9.
- 283 Guillaume, T., Cooper, N., Brusatte, S. L., Davis, K. E., Jackson, A. L., Gerber, S., Goswami, A., Healy,  
284 K., Hopkins, M. J., Jones, M. E. H., Lloyd, G. T., O'Reilly, J. E., Pate, A., Puttick, M. N., Rayfield,  
285 E. J., Saupe, E. E., Sherratt, E., Slater, G. J., Weisbecker, V., ... Donoghue, P. C. J. (2020).  
286 Disparities in the analysis of morphological disparity. *Biology Letters*, 16(7), 20200199.
- 287 Guillaume, T., Puttick, M. N., Marcy, A. E., & Weisbecker, V. (2020). Shifting spaces: Which disparity  
288 or dissimilarity measurement best summarize occupancy in multidimensional spaces? *Ecology and*  
289 *Evolution*, 10(14), 7261–7275.
- 290 Harding, S. A. (2021). *Analysis of the Faunal Remains from the Ma'agan Mikhael B Shipwreck* (N.  
291 Marom (ed.)) [MA]. University of Haifa.
- 292 Haruda, A. F., Varfolomeev, V., Goriachev, A., Yermolayeva, A., & Outram, A. K. (2019). A new  
293 zooarchaeological application for geometric morphometric methods: Distinguishing *Ovis aries*  
294 morphotypes to address connectivity and mobility of prehistoric Central Asian pastoralists. *Journal*  
295 *of Archaeological Science*, 107, 50–57.
- 296 Hulme-Beaman, A. (2014). *Exploring the human-mediated dispersal of commensal small mammals using*  
297 *dental morphology : rattus exulans and rattus rattus* [Paris, Muséum national d'histoire naturelle].  
298 <http://www.theses.fr/2014MNHN0031>
- 299 Humbert, J.-B. (1981). RÉCENTS TRAVAUX A TELL KEISAN (1979-1980). *Revue Biblique (1946-)*,  
300 88(3), 373–398.
- 301 Krause-Kyora, B., Makarewicz, C., Evin, A., Flink, L. G., Dobney, K., Larson, G., Hartz, S., Schreiber,  
302 S., von Carnap-Bornheim, C., von Wurmb-Schwark, N., & Nebel, A. (2013). Use of domesticated  
303 pigs by Mesolithic hunter-gatherers in northwestern Europe. *Nature Communications*, 4, 2348.
- 304 Muñiz, A. M., Pecharroman, M. A. C., Carrasquilla, F. H., & von Lettow-Vorbeck, C. L. (1995). Of mice  
305 and sparrows: Commensal faunas from the Iberian iron age in the duero valley (central Spain). *Int. J.*  
306 *Osteoarchaeol.*, 5(2), 127–138.
- 307 Ottoni, C., Flink, L. G., Evin, A., Geörg, C., De Cupere, B., Van Neer, W., Bartosiewicz, L., Linderholm,  
308 A., Barnett, R., Peters, J., Decorte, R., Waelkens, M., Vanderheyden, N., Ricaut, F.-X., Cakirlar, C.,  
309 Cevik, O., Hoelzel, A. R., Mashkour, M., Karimlu, A. F. M., ... Larson, G. (2013). Pig  
310 domestication and human-mediated dispersal in western Eurasia revealed through ancient DNA and  
311 geometric morphometrics. *Molecular Biology and Evolution*, 30(4), 824–832.
- 312 Pöllath, N., Schafberg, R., & Peters, J. (2019). Astragalar morphology: Approaching the cultural  
313 trajectories of wild and domestic sheep applying Geometric Morphometrics. *Journal of*  
314 *Archaeological Science: Reports*, 23, 810–821.
- 315 Rohlf, J. (2015). The tps series of software. *Hystrix*, 26(1), 9–12.

- 316 Rohlf, J. F. (2017). *TPSdig*.
- 317 Schipper, B. (n.d.). *Tell Keisan Excavations – Archaeological excavations at the site of Tell Keisan in*  
318 *Israel*. Retrieved December 23, 2022, from <https://keisan.uchicago.edu/>
- 319 Susnow, M., Marom, N., & Shatil, A. (2021). Contextualizing an Iron Age IIA Hoard of Astragali from  
320 Tel Abel Beth Maacah, Israel. *Journal of*. <https://journal.equinoxpub.com/JMA/article/view/20597>
- 321 Valenzuela-Lamas, S., Orengo, H. A., Bosch, D., Pellegrini, M., Halstead, P., Nieto-Espinet, A.,  
322 Trentacoste, A., Jiménez-Manchón, S., López-Reyes, D., & Jornet-Niella, R. (2018). Shipping  
323 amphorae and shipping sheep? Livestock mobility in the north-east Iberian peninsula during the Iron  
324 Age based on strontium isotopic analyses of sheep and goat tooth enamel. *PloS One*, *13*(10),  
325 e0205283.
- 326 Wickham, H., Averick, M., Bryan, J., Chang, W., McGowan, L. D., François, R., Grolemund, G., Hayes,  
327 A., Henry, L., Hester, J., Kuhn, M., Pedersen, T. L., Miller, E., Bache, S. M., Müller, K., Ooms, J.,  
328 Robinson, D., Seidel, D. P., Spinu, V., ... Yutani, H. (2019). Welcome to the tidyverse. In *Journal of*  
329 *Open Source Software* (Vol. 4, Issue 43, p. 1686).
- 330 Xiao, N. (2018). *ggsci: Scientific Journal and Sci-Fi Themed Color Palettes for “ggplot2.”*  
331 <https://CRAN.R-project.org/package=ggsci>
- 332 Yahalom-Mack, N., Panitz-Cohen, N., & Mullins, R. (2018). From a Fortified Canaanite City-State to ``a  
333 City and a Mother’ in Israel: Five Seasons of Excavation at Tel Abel Beth Maacah. *Near Eastern*  
334 *Archaeology*, *81*(2), 145–156.
- 335 Yezerinac, S. M., Loughheed, S. C., & Handford, P. (1992). Measurement Error and Morphometric  
336 Studies: Statistical Power and Observer Experience. *Systematic Biology*, *41*(4), 471–482.
- 337 Zeder, M. A., & Lapham, H. A. (2010). Assessing the reliability of criteria used to identify postcranial  
338 bones in sheep, Ovis, and goats, Capra. *Journal of Archaeological Science*, *37*(11), 2887–2905.
- 339
